# Supplementary material for: Fabrication of thermo-responsive multicore microcapsules using a facile extrusion process
Source: Royal Society of Chemistry journal article supplement (doi:10.1039/d4ra03131h), 2024-01-01
Supplement: d4ra03131h1.pdf [file d4ra03131h1.pdf]

## Supporting information

### **Fabrication of thermo-responsive multicore microcapsules using a facile extrusion process**

Jean-Danick Lavertu<sup>a</sup>, Kamaljeet Kaur Bawa<sup>b</sup>, Sabahudin Hrapovic,<sup>a</sup> Dong Fu,<sup>a</sup> Jung Kwon Oh<sup>b</sup>  
and Usha D. Hemraz<sup>a,c\*</sup>

<sup>a</sup>Aquatic and Crop Resource Development, National Research Council of Canada, 6100  
Royalmount Avenue, Montreal, Quebec, H4P 2R2, Canada

<sup>b</sup>Department of Chemistry and Biochemistry, Concordia University, Montreal, Quebec, H4B 1R6,  
Canada

<sup>c</sup>Human Health Therapeutics, National Research Council of Canada, 6100 Royalmount Avenue,  
Montreal, Quebec, H4P 2R2, Canada

\*Email: [Usha.Hemraz@nrc-cnrc.gc.ca](mailto:Usha.Hemraz@nrc-cnrc.gc.ca)

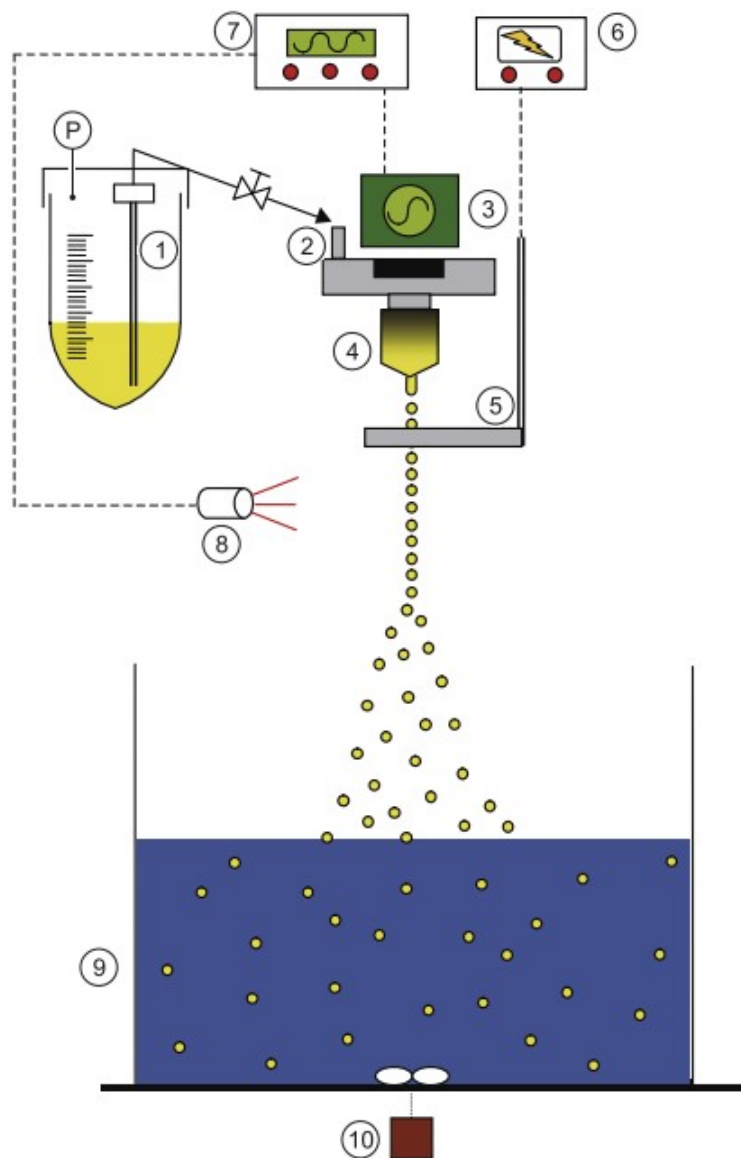

**Figure 4-1:** Schematic representation of the Encapsulator B-390

- |                       |                       |
|-----------------------|-----------------------|
| ① Pressure bottle     | ⑦ Vibration control   |
| ② Bead producing unit | ⑧ LED/stroboscope     |
| ③ Vibration unit      | ⑨ Polymerization bath |
| ④ Single nozzle       | ⑩ Magnetic stirrer    |
| ⑤ Electrode           | (P) Air pressure      |
| ⑥ Dispersion control  |                       |

**Figure S1:** Schematic representation of the encapsulator B-390

Reference: [OM\\_11593477\\_B-390\\_en.pdf \(buchi.com\)](https://www.buchi.com/OM_11593477_B-390_en.pdf)

## **Single nozzle procedure**

A single nozzle can be used to form beads (or capsules by coacervation). The encapsulant liquid was first added to the pressure bottle connected to the encapsulator. The latter was connected to a gas tank (compressed air or nitrogen) to create pressure that would allow the liquid to flow through the tubing. The flow of the liquid could be regulated by the flow valve prior to its entrance to the bead producing unit, which in turn formed small droplets when it prilled the solution out of the nozzle. A strobe light is included in the machine to help see the individual droplets as they fall into a Petri dish or watch glass placed above the bath. Once a continuous bead chain was obtained, a voltage was applied at the electrode through which the droplets pass to prevent them from aggregating. The electrode gave them a charge, which made them repulse due to electrostatic forces and keep them from sticking together. The watch glass or Petri dish used as protection was then removed to allow the droplets to fall into a stirring hardening bath, grounded by a wire, where each drop can solidify and form a bead or capsule. The beads and capsules were interchangeably stored in water, in a refrigerator ( $\sim 4$  °C) or at room temperature, unless specified otherwise.

## **Hot prilling**

Hot prilling is a type of extrusion which relies on temperature to solidify the polymer solution used. The temperature is above the melting temperature of the polymer. The type of prilling can be used with any nozzle, following a few deviations from the normal protocol. First, the polymer was loaded into a pressure bottle in a water bath and the temperature was adjusted until it was just above the melting point. The bead producing unit temperature was set to at least 10 °C above the polymer bath temperature. The temperature of the hardening bath was typically between 5-15 °C. The polymer solution should not linger in the tubing or in the bead producing unit before or in-between productions as it would clog the instrument.

**Experimental conditions for formation of  $\kappa$ -carrageenan ( $\kappa$ -c) single beads (hot prilling)**

| Method                    | Single nozzle            |
|---------------------------|--------------------------|
| Contents                  | 1% K-C                   |
| Frequency                 | 2000 Hz                  |
| Nozzle size               | 200 $\mu$ m              |
| Pressure and/or flow rate | 600-900 mbar             |
| Amplitude                 | 4                        |
| Voltage                   | 0 V                      |
| Bath                      | 2% KCl (10 $^{\circ}$ C) |
| Bath conditions           | 30 minutes               |
| Nozzle temperature        | 60 $^{\circ}$ C          |

**Experimental conditions for formation of sodium alginate and chitosan multicore microcapsules.**

| Method                    | Single nozzle          | Single nozzle (double encapsulation to produce multicore microcapsules) |
|---------------------------|------------------------|-------------------------------------------------------------------------|
| Contents                  | 1% Na-alginate         | 1/6 Ca-alginate beads in 1% chitosan                                    |
| Frequency. (Hz)           | 2000 Hz                | 400 Hz                                                                  |
| Nozzle size ( $\mu$ m)    | 80 $\mu$ m             | 750 $\mu$ m                                                             |
| Pressure and/or flow rate | 60 mL/h                | Manually (1000-2000 mL/h)                                               |
| Amplitude                 | 4                      | 4                                                                       |
| Voltage                   | 1000 V                 | 2000-4000 V                                                             |
| Bath                      | 0.1M CaCl <sub>2</sub> | 1% Na-triphosphate                                                      |
| Bath conditions           | 30 min                 | 1 hour                                                                  |

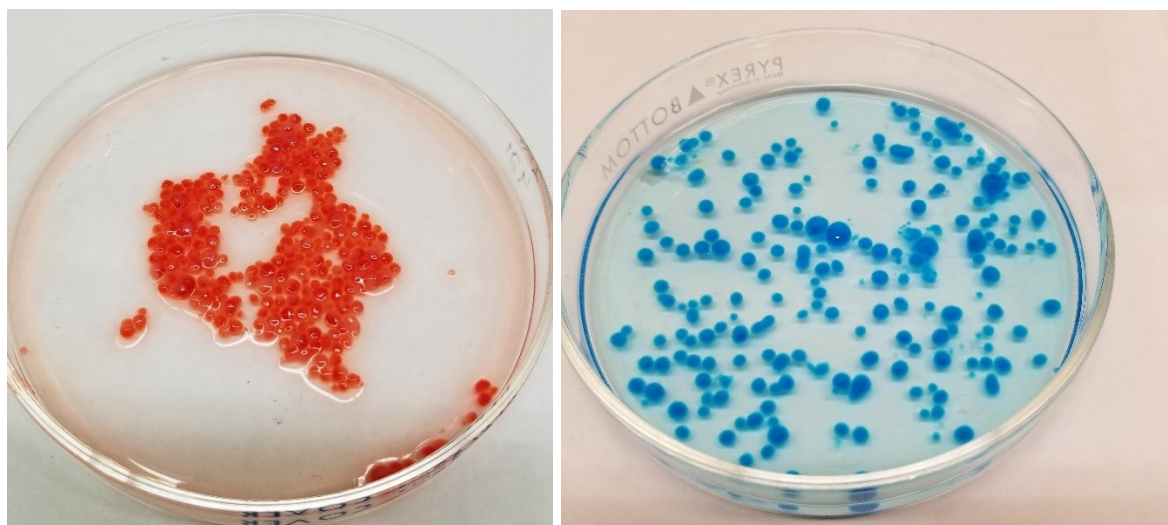

**Figure S2: Red and blue  $\kappa$ -carrageenan ( $\kappa$ -c) single beads prior to multicore microcapsules formation**
